# Supplementary material for: Two novel lactic acid bacteria,Limosilactobacillus fermentumMN-LF23 andLactobacillus gasseriMN-LG80, inhibitedHelicobacter pyloriinfection in C57BL/6 mice
Source: Royal Society of Chemistry journal article supplement (doi:10.1039/d2fo02034c), 2022-01-01
Supplement: d2fo02034c1.xlsx [file d2fo02034c1.xlsx]

## Sheet: Sheet2
Strain number	Source	Taxonomy	Acid-resistant survival rate (%)	Inhibition zone diameter (mm)
D061-A-04	Acid water	Lactobacillus reuteri	20.32±1.95	14.53±0.12
105-1	breast fan	Lactobacillus parcasei	0	12.17±0.34
LG-1	Milk bumps	Lactobacillus gasseri	0	17.40±0.22
14-6-1	Bama longevity old man excrement	Lactobacillus plantarum	0	15.80±0.71
17-9	Pickle	Lactobacillus plantarum	17.65±1.54	16.73±0.37
G021-A-10	Acid water	Lactobacillus reuteri	65.24±12.27	14.53±0.21
ZhiIV	Pickle	Lactobacillus plantarum	0	15.87±0.33
YP-01	Pickle	Lactobacillus plantarum	0	0
L duo	Cheese	Lactobacillus parcasei	10.63±1.17	12.73±0.142
G028-B-01	Breast fan	Lactobacillus reuteri		0
G22-A-06	Acid water	Lactococcus lactis	0	19.10±0.22
M014-D-02	Milk	Lactobacillus plantarum	0	16.07±0.26
Zhi（F）	Pickle	Lactobacillus plantarum	8.37±1.13	11.47±.12
17-20	Pickle	Lactobacillus plantarum	0	0
A066-A-04	Cheesecake	Lactobacillus plantarum	0	0
E30-B-10	Pickle	Lactobacillus plantarum	11.97±0.61	0
MN-LG80	Milk bumps	Lactobacillus gasseri	72.66±3.28	14.60±0.67
14-6-3	Bama longevity old man excrement	Lactobacillus plantarum	0	11.97±0.26
A028-A-10	Goat milk	Lactobacillus plantarum	0	0
LCS	Pickle	Lactobacillus plantarum	70.66±7.12	12.07±0.29
LR-F	Acid water	Lactobacillus reuteri	56.34±8.68	0
17-13	Pickle	Lactobacillus plantarum	10.80±0.95	0
MN-LF23	Milk bumps	Lactobacillus fermentum	96.32±15.53	12.50±0.16
B16MV	Milk bumps	Lactobacillus gasseri	0	0
ZhiII	Pickle	Lactobacillus plantarum	0	0
17-14-1	Pickle	Lactobacillus plantarum	52.63±0.73	0
LZ	Pickle	Lactobacillus parcasei	0	0
C017-D-12	Breast fan	Lactobacillus plantarum	0	0
D061-A-3	Acid water	Lactobacillus reuteri	35.83±3.83	0
17-12	Pickle	Lactobacillus plantarum	24.09±4.72	0
17-16	Pickle	Lactobacillus plantarum	0.35±0.26	0
14-13-2	Bama longevity old man excrement	Lactobacillus plantarum	0	0
17-18	Pickle	Lactobacillus plantarum	0	0
